# Supplementary material
Source: MDPI journal article supplement (https://www.mdpi.com/2571-9408/6/5/234)
Supplement: s1 [file s1]

# A Workflow for Uncertainty Assessment in Elemental Analysis of Archaeological Ceramics: A Case Study of Neolithic Coarse Pottery from Eastern Siberia

Galina V. Pashkova <sup>1,\*</sup>, Mikhail A. Statkus <sup>2</sup>, Maria M. Mukhamedova <sup>1,3</sup>, Alexander L. Finkelshtein <sup>3,4</sup>, Irina V. Abdrashitova <sup>2</sup>, Olga Yu. Belozeroва <sup>4</sup>, Victor M. Chubarov <sup>1,4</sup>, Alena A. Amosova <sup>4</sup>, Artem S. Maltsev <sup>1</sup>, Elena I. Demonterova <sup>1</sup> and Dmitriy L. Shergin <sup>3</sup>

<sup>1</sup> Institute of the Earth's Crust, SB RAS, 128 Lermontov St., 640033 Irkutsk, Russia; m.mukhamedova2017@yandex.ru (M.M.M.); chubarov@igc.irk.ru (V.M.C.); maltsev@crust.irk.ru (A.S.M.); dem@crust.irk.ru (E.I.D.)

<sup>2</sup> Chemistry Department, Lomonosov Moscow State University, 1-3 Leninskie Gory, 119991 Moscow, Russia; statkusma@my.msu.ru (M.A.S.); 1543irina@rambler.ru (I.V.A.)

<sup>3</sup> Pedagogical Institute, Irkutsk State University, 1 K. Marx St., 664003 Irkutsk, Russia; finkel@igc.irk.ru (A.L.F.); dmitriy-shergin@rambler.ru (D.L.S.)

<sup>4</sup> Vinogradov Institute of Geochemistry, SB RAS, 1A Favorsky St., 664033 Irkutsk, Russia; obel@igc.irk.ru (O.Y.B.); amosova@igc.irk.ru (A.A.A.)

\* Correspondence: pashkova.gv@yandex.ru

**Table S1.** The average composition of ceramic samples nos. 9, 62, 63, 66 obtained by WDXRF (major oxides) and ICP MS (minor and trace elements).

|                                        | no. 9 | no. 62 | no. 63 | no. 66 |
|----------------------------------------|-------|--------|--------|--------|
| Na <sub>2</sub> O, wt. %               | 1.15  | 1.22   | 0.95   | 0.33   |
| MgO, wt. %                             | 1.34  | 1.30   | 1.28   | 1.93   |
| Al <sub>2</sub> O <sub>3</sub> , wt. % | 12.24 | 12.58  | 17.30  | 18.25  |
| SiO <sub>2</sub> , wt. %               | 68.07 | 65.72  | 58.24  | 62.08  |
| P <sub>2</sub> O <sub>5</sub> , wt. %  | 0.10  | 0.51   | 0.86   | 0.19   |
| K <sub>2</sub> O, wt. %                | 2.05  | 1.86   | 3.41   | 2.64   |
| CaO, wt. %                             | 1.11  | 1.20   | 2.44   | 2.01   |
| TiO <sub>2</sub> , wt. %               | 0.56  | 0.56   | 0.98   | 1.03   |
| MnO, wt. %                             | 0.11  | 0.14   | 0.23   | 0.03   |
| Fe <sub>2</sub> O <sub>3</sub> , wt. % | 4.84  | 5.35   | 6.41   | 6.10   |
| V, µg/g                                | 77    | 65     | 139    | 122    |
| Cr, µg/g                               | 86    | 110    | 96     | 120    |
| Ni, µg/g                               | 57    | 40     | 33     | 47     |
| Cu, µg/g                               | 24    | 19     | 17     | 23     |
| Zn, µg/g                               | 44    | 65     | 115    | 132    |
| Ga, µg/g                               | 13    | 10     | 17     | 20     |
| Rb, µg/g                               | 66    | 44     | 78     | 87     |
| Sr, µg/g                               | 108   | 88     | 187    | 90     |
| Y, µg/g                                | 19    | 17     | 22     | 27     |
| Zr, µg/g                               | 202   | 157    | 176    | 208    |
| Ba, µg/g                               | 571   | 688    | 1101   | 489    |
| La, µg/g                               | 22    | 19     | 37     | 39     |
| Ce, µg/g                               | 44    | 37     | 76     | 77     |
| Nd, µg/g                               | 21    | 18     | 30     | 33     |
| Th, µg/g                               | 5.6   | 5.6    | 13     | 11     |
| U, µg/g                                | 1.3   | 1.4    | 1.9    | 4.3    |
| LOI, wt. %                             | 6.78  | 8.73   | 7.36   | 4.29   |

LOI – loss on ignition

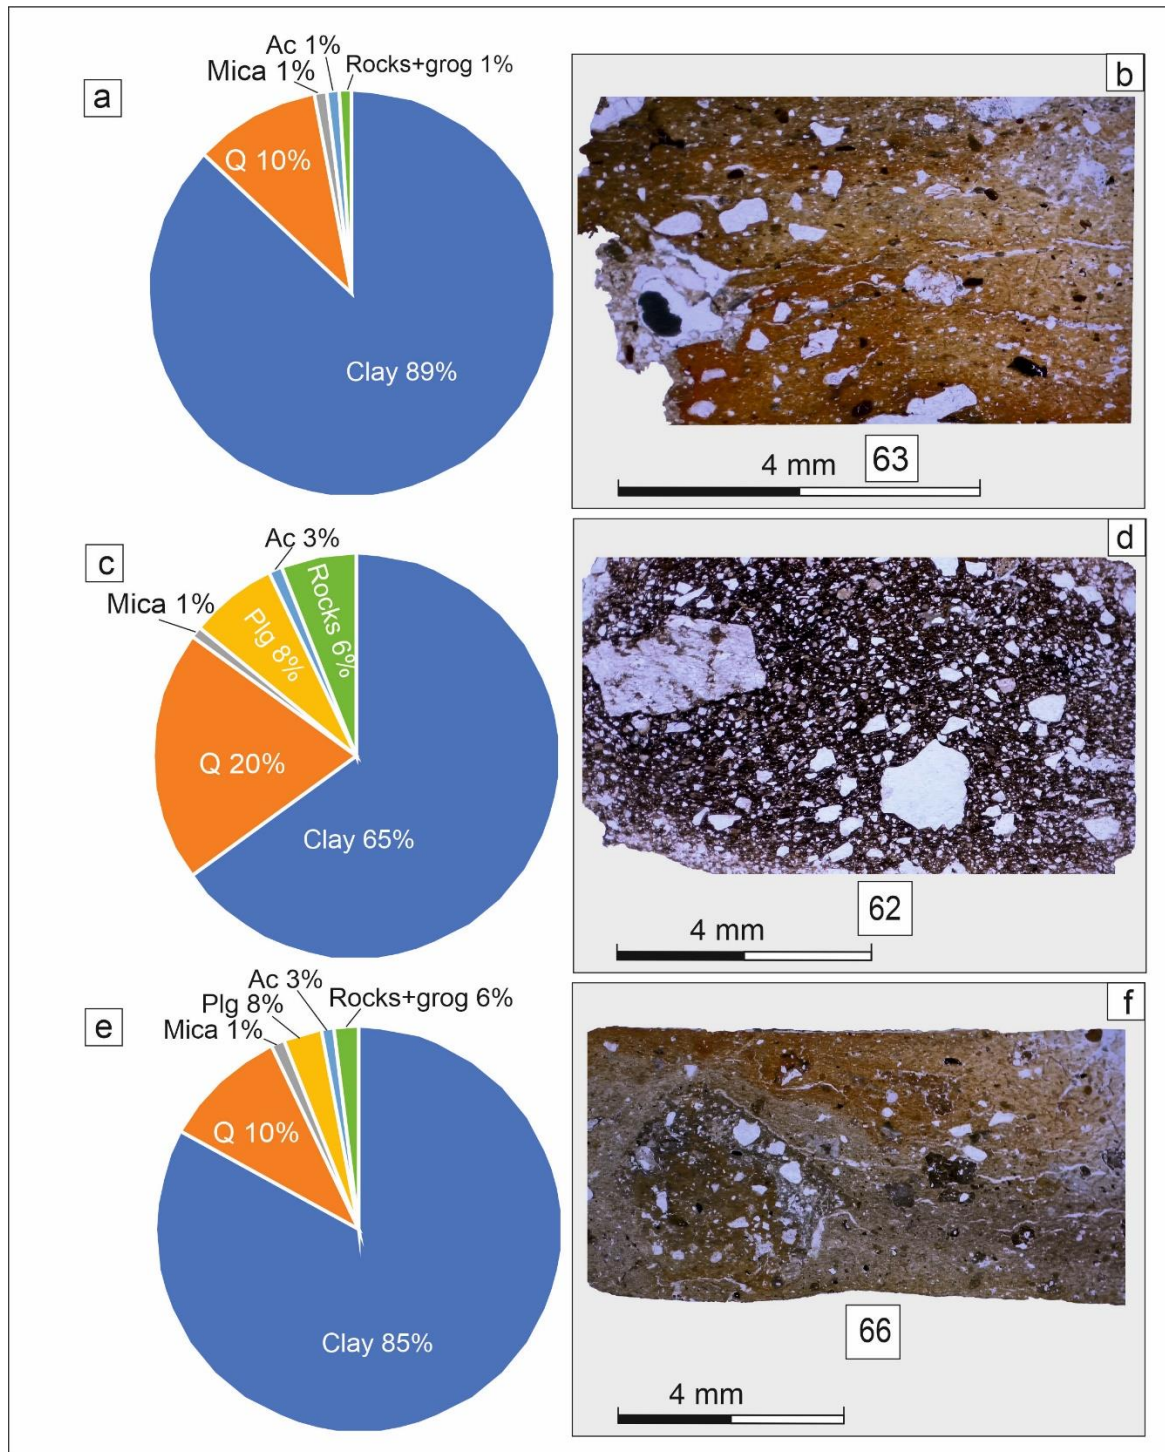

**Figure S1.** Dominant mineralogical combinations of the ceramics for our samples (Q – quartz, Mica, Fsp - plagioclase or K-feldspar, Ac – accessory minerals and Rock– fragments of granite and chert, grog - argillaceous clay fragments with or without mineral grains) (a, c, e). Microphotographs of pottery thin sections under plane-polarized light (b, d, f). Large inhomogeneous inclusions in ceramics include fragments of rocks and temper. Clear or translucent minerals of an angular, subangular and subrounded shape are medium- and fine-grained minerals of quartz and plagioclase or K-feldspar.

**Table S2.** The composition of mineral phases in ceramic samples obtained by SEM-EDS (wt.%).

| Sample | Mineral phase    | Determined elements in oxide form |       |                                |                  |                  |       |                  |                                |       |       |                               |      |                 |      | Total  |
|--------|------------------|-----------------------------------|-------|--------------------------------|------------------|------------------|-------|------------------|--------------------------------|-------|-------|-------------------------------|------|-----------------|------|--------|
|        |                  | Na <sub>2</sub> O                 | MgO   | Al <sub>2</sub> O <sub>3</sub> | SiO <sub>2</sub> | K <sub>2</sub> O | CaO   | TiO <sub>2</sub> | Cr <sub>2</sub> O <sub>3</sub> | MnO   | FeO   | P <sub>2</sub> O <sub>5</sub> | BaO  | SO <sub>3</sub> | Cl   |        |
| 62a    | K-feldspar       | 0.89                              |       | 15.76                          | 54.19            | 12.91            |       |                  |                                |       |       |                               |      |                 |      | 83.75  |
|        | Quartz           |                                   |       |                                | 100              |                  |       |                  |                                |       |       |                               |      |                 |      | 100    |
|        | Quartz           |                                   |       |                                | 91.20            |                  |       |                  |                                |       |       |                               |      |                 |      | 91.20  |
|        | K-feldspar       | 0.31                              |       | 18.76                          | 64.78            | 16.21            |       |                  |                                |       | 0.15  |                               | 0.54 |                 |      | 100.76 |
|        | Magnetite        |                                   |       | 2.57                           | 2.74             |                  | 1.36  | 0.23             |                                |       | 82.36 | 1.28                          |      |                 |      | 90.54  |
|        | Magnetite        |                                   |       | 2.97                           | 3.59             |                  | 1.30  | 0.27             |                                |       | 82.46 | 1.31                          |      |                 |      | 91.90  |
|        | Goethite         |                                   |       | 0.81                           | 0.34             |                  |       | 1.05             |                                |       | 86.31 |                               |      |                 |      | 88.52  |
| 62b    | Plagioclase      | 7.90                              |       | 23.30                          | 60.31            | 0.37             | 4.87  |                  |                                |       | 0.15  |                               |      |                 |      | 96.90  |
|        | Quartz           |                                   |       | 0.91                           | 92.66            | 0.30             |       |                  |                                |       |       |                               |      |                 |      | 93.86  |
|        | K-feldspar       | 1.01                              |       | 19.05                          | 64.78            | 15.06            |       |                  |                                |       | 0.19  |                               |      |                 |      | 100.09 |
|        | K-feldspar       | 0.65                              |       | 18.42                          | 64.18            | 15.96            |       |                  |                                |       | 0.30  |                               |      |                 |      | 99.51  |
|        | Quartz           |                                   |       | 0.15                           | 93.73            |                  |       |                  |                                |       | 0.19  |                               |      |                 |      | 94.07  |
|        | Magnetite        |                                   | 1.87  | 1.34                           | 0.26             |                  |       | 10.08            | 0.61                           |       | 73.19 |                               |      |                 |      | 87.35  |
|        | Quartz           |                                   |       |                                | 99.97            |                  |       |                  |                                |       |       |                               |      |                 |      | 99.97  |
| 63a    | K-feldspar       | 0.36                              |       | 18.21                          | 63.03            | 15.99            |       |                  |                                |       | 0.14  |                               |      |                 |      | 97.73  |
|        | Epidote          |                                   |       | 20.80                          | 36.37            | 1.55             | 18.92 |                  |                                | 0.17  | 9.91  | 0.27                          |      |                 |      | 87.99  |
|        | Chlorite         | 0.24                              | 13.32 | 19.82                          | 32.05            | 1.05             | 0.87  |                  |                                | 0.25  | 20.08 |                               |      |                 |      | 87.67  |
|        | Chlorite         |                                   | 17.38 | 21.62                          | 29.33            | 0.17             | 0.15  |                  |                                | 0.40  | 26.57 |                               |      |                 |      | 95.61  |
|        | K-feldspar       | 0.59                              |       | 19.03                          | 66.34            | 16.56            |       |                  |                                |       | 0.17  |                               |      |                 |      | 102.69 |
|        | Quartz           |                                   |       | 0.17                           | 94.37            |                  |       |                  |                                |       |       |                               |      |                 |      | 94.54  |
| 63b    | Quartz           |                                   |       |                                | 95.33            |                  |       |                  |                                |       |       |                               |      |                 |      | 95.33  |
|        | K-feldspar       | 0.71                              |       | 19.08                          | 65.08            | 15.88            |       |                  |                                |       | 0.27  |                               | 0.39 |                 |      | 101.42 |
|        | Mn-bearing phase | 0.16                              | 0.45  | 3.12                           | 3.25             | 0.10             | 1.36  | 0.21             |                                | 64.43 | 1.39  | 1.12                          | 0.98 | 0.47            | 0.10 | 77.15  |
|        | Quartz           |                                   |       |                                | 99.84            |                  |       |                  |                                |       |       |                               |      |                 |      | 99.84  |
| 66a    | K-feldspar       | 0.55                              |       | 18.37                          | 64.48            | 16.55            |       |                  |                                |       |       |                               |      |                 |      | 99.95  |
|        | Epidote          |                                   | 0.36  | 24.07                          | 33.67            |                  | 19.28 |                  |                                | 0.43  | 9.66  |                               |      |                 |      | 87.48  |
|        | Plagioclase      | 8.41                              |       | 22.60                          | 62.21            | 1.01             | 2.35  |                  |                                |       | 0.40  |                               |      |                 |      | 96.98  |
|        | K-feldspar       | 0.40                              |       | 17.65                          | 61.91            | 15.94            |       |                  |                                |       | 0.26  |                               |      |                 |      | 96.16  |
|        | Quartz           |                                   |       |                                | 99.84            |                  |       |                  |                                |       |       |                               |      |                 |      | 99.84  |
| 66b    | Ca-enriched zone |                                   | 1.26  | 4.55                           | 7.19             | 0.49             | 21.87 |                  |                                |       | 1.44  | 0.85                          |      | 0.20            | 0.10 | 37.95  |
|        | Ca-enriched zone | 0.34                              | 0.90  | 3.34                           | 6.42             | 0.23             | 23.16 |                  |                                |       | 0.87  | 0.96                          |      | 0.17            | 0.10 | 36.49  |
|        | Ca-enriched zone |                                   | 0.68  | 1.10                           | 3.17             |                  | 30.17 |                  |                                |       | 0.44  | 0.44                          |      | 0.07            | 0.08 | 36.14  |
|        | Ca-enriched zone |                                   | 0.61  | 1.19                           | 0.90             |                  | 28.49 |                  |                                |       | 0.33  | 0.55                          |      | 0.15            | 0.10 | 32.32  |
